# Supplementary material
Source: Springer Nature journal article supplement (https://www.springermedizin.de/resource/supplementary/12913_2007_524_MOESM2_ESM.pdf/9534938)

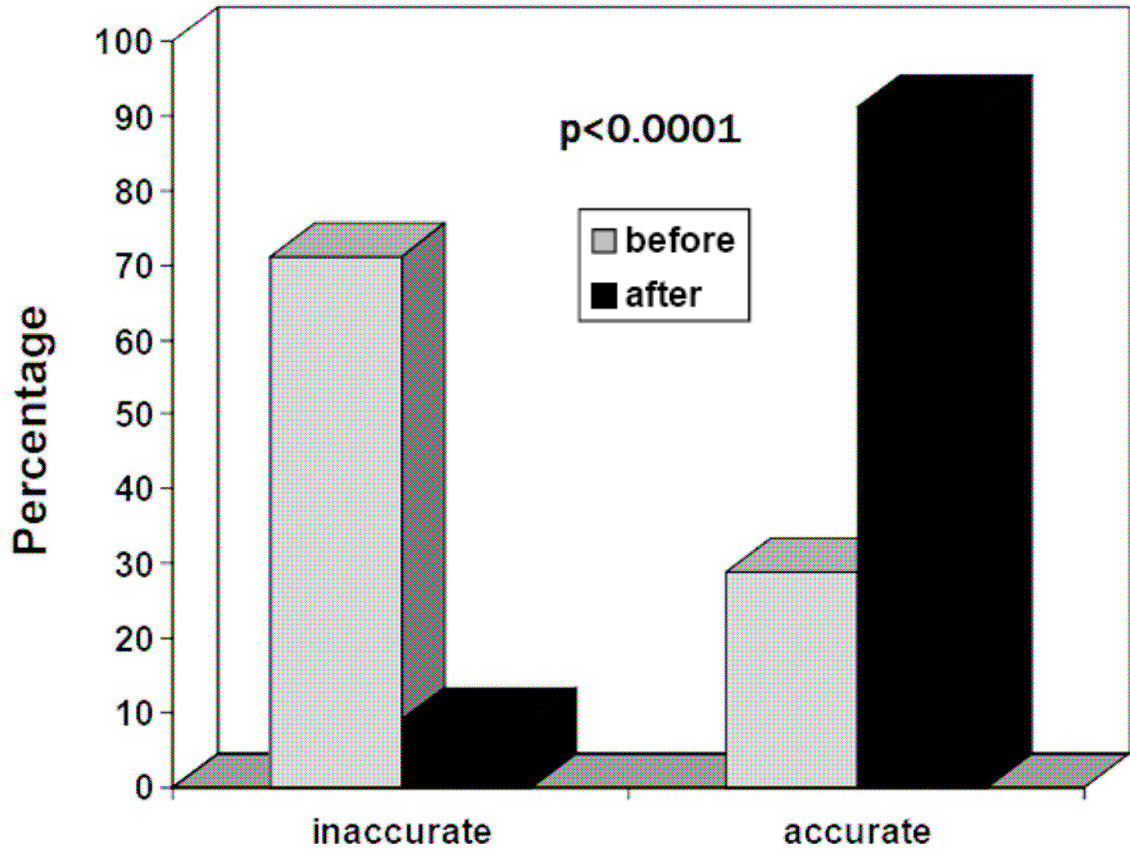

Supplement: MOESM2 [file 9534938]
